# Supplementary material for: Loss of In Vivo Replication Fitness of HIV-1 Variants Resistant to the Tat Inhibitor, dCA
Source: Viruses. 2023 Apr 12;15(4):950. doi: 10.3390/v15040950 (PMC10146675; doi:10.3390/v15040950)
Supplement: Supplementary file 1 [file viruses-15-00950-s001.zip › viruses-2284388-SI.pdf]

# Supplementary Materials

**Table S1. Levels of human hematopoietic cells and human T cells in peripheral blood of humanized mice prior to HIV-1 exposure.**

| Group          | Mouse ID | % hCD45+       | % CD3+ of hCD45+ | % CD4+ of CD3+ | % CD8+ of CD3+ |
|----------------|----------|----------------|------------------|----------------|----------------|
| WT             | 1        | 77.7           | 82.0             | 81.3           | 17.0           |
|                | 2        | 51.0           | 74.7             | 84.4           | 14.2           |
|                | 3        | 78.9           | 64.7             | 78.3           | 19.1           |
|                | 4        | 23.4           | 79.4             | 71.3           | 23.1           |
|                | 5        | 59.8           | 54.8             | 87.7           | 11.5           |
|                | 6        | 29.8           | 86.3             | 70.8           | 26.5           |
|                | 7        | 61.3           | 42.6             | 79.5           | 18.1           |
|                | 8        | 73.4           | 69.6             | 73.2           | 24.8           |
| Mean $\pm$ SEM |          | 50.7 $\pm$ 9.0 | 61.8 $\pm$ 8.8   | 69.9 $\pm$ 8.6 | 17.6 $\pm$ 2.4 |
| MUT1           | 9        | 61.1           | 60.8             | 83.5           | 14.3           |
|                | 10       | 77.7           | 87.8             | 80.6           | 17.5           |
|                | 11       | 47.0           | 80.4             | 82.3           | 16.0           |
|                | 12       | 73.3           | 78.8             | 72.4           | 25.9           |
|                | 13       | 37.7           | 87.9             | 48.4           | 33.7           |
|                | 14       | 90.1           | 89.8             | 92.9           | 6.2            |
|                | 15       | 24.9           | 79.1             | 79.3           | 18.1           |
|                | 16       | 62.2           | 33.7             | 66.8           | 30.5           |
|                | 17       | 58.9           | 37.3             | 79.5           | 18.3           |
|                | 18       | 25.3           | 36.6             | 93.0           | 6.0            |
| Mean $\pm$ SEM |          | 51.2 $\pm$ 7.8 | 61.7 $\pm$ 8.6   | 71.4 $\pm$ 7.4 | 17.7 $\pm$ 2.8 |
| MUT2           | 19       | 65.1           | 80.1             | 83.1           | 14.6           |
|                | 20       | 69.0           | 77.9             | 80.5           | 17.5           |
|                | 21       | 63.1           | 78.1             | 79.3           | 17.5           |
|                | 22       | 59.4           | 87.2             | 81.5           | 15.9           |
|                | 23       | 73.6           | 82.8             | 86.5           | 11.9           |
|                | 24       | 59.6           | 79.6             | 82.6           | 14.9           |
|                | 25       | 31.8           | 25.6             | 51.2           | 44.6           |
|                | 26       | 71.9           | 56.7             | 81.0           | 17.2           |
| Mean $\pm$ SEM |          | 55.8 $\pm$ 7.2 | 64.2 $\pm$ 9.3   | 70.7 $\pm$ 8.2 | 18.5 $\pm$ 3.3 |

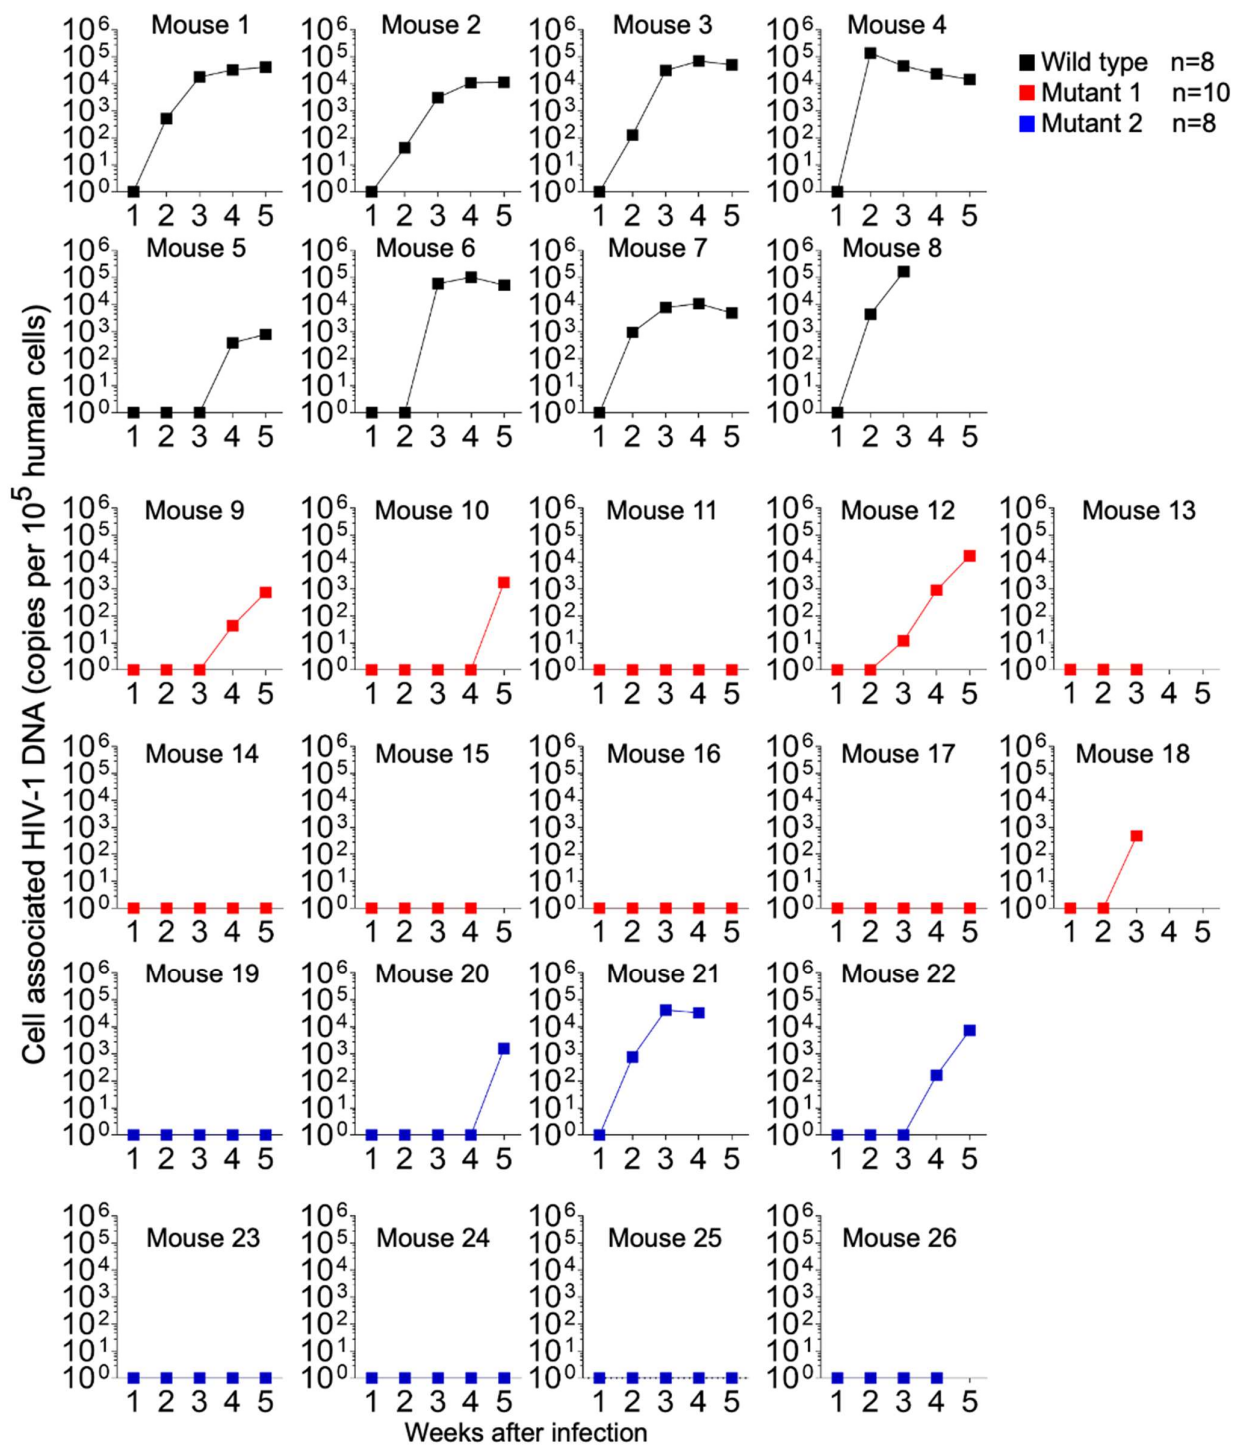

Figure S1. HIV-1 proviral DNA monitored longitudinally by qPCR.
